# Supplementary material for: Inherited Proteoglycan Biosynthesis Defects—Current Laboratory Tools and Bikunin as a Promising Blood Biomarker
Source: MDPI journal article supplement (doi:10.3390/genes12111654), 2021-10-20
Supplement: s1 [file s1]

Supplementary Table S1. Overview of some proteoglycans and their pathophysiological involvements.

| Location               | Designation    | Type of<br>GAG chain | Role                                                                                                                            |
|------------------------|----------------|----------------------|---------------------------------------------------------------------------------------------------------------------------------|
| Intracellular          | Serglycin (SG) | Heparin/CS           | Formation of intracellular storage granules in mast cells [1].                                                                  |
| Cell surface           | Syndecans      | HS/CS                | Regulation of vascular development and wound healing [2].                                                                       |
|                        | Glypicans      | HS                   | Regulation of Wnt and FGF signaling pathways during growth, development and cancer [3].                                         |
| Extracellular matrices | Aggrecan       | CS/KS                | Provides the mechanical properties of cartilage [4].                                                                            |
|                        | Fibromodulin   | KS                   | Regulation of collagen fibrillogenesis, muscle cell growth, cellular reprogramming, and angiogenesis [5].                       |
|                        | Decorin        | DS                   | Promotes collagen fibrillogenesis [6] and inhibits tyrosine kinase receptors [7].                                               |
|                        | Biglycan       | CS/DS                | Promotes collagen fibrillogenesis [8] and promotes osteoblast differentiation and bone maturation [9].                          |
|                        | Collagen XVIII | HS                   | Structural component of the basement membranes of vascular and epithelial cells. Inhibits angiogenesis and Wnt signalling [10]. |

|       |                                           |    |                                                                                                                                                                      |
|-------|-------------------------------------------|----|----------------------------------------------------------------------------------------------------------------------------------------------------------------------|
| Blood | Endocan                                   | DS | Regulation of cell adhesion, migration, proliferation, and angiogenesis in cancer and wound healing [11].                                                            |
|       | Inter- $\alpha$ -trypsin inhibitor family | CS | Stabilization of extracellular matrices, anti-plasmin activity, inhibition of complement activation and protection against kidney stone formation [12].              |
|       | PG-100                                    | CS | Inhibition of atherosclerosis formation by trapping of low-density lipoprotein [13].<br>Growth factor activity triggering differentiation of bone marrow cells [14]. |
|       | Apolipoprotein-O                          | CS | Regulation of fatty acid metabolism and oxidative stress during inflammation [15-16]                                                                                 |

Supplementary Table S2. Proteoglycan inherited metabolic diseases: Classification and clinical aspects.

| PG defect subgroup                                                       | Mutated gene                                                                                   | Associated disorder and clinical features                                                                                                                                                |
|--------------------------------------------------------------------------|------------------------------------------------------------------------------------------------|------------------------------------------------------------------------------------------------------------------------------------------------------------------------------------------|
| <b>Defects of the tetrasaccharide linkage region</b><br>(Linkeropathies) | <i>XYLT1</i><br>Initiating xylose transfer to the core protein (Xyl $\beta$ 1- <i>O</i> -Ser). | - <b>Desbuquois dysplasia type 2</b> (MIM - 615777):<br>Short long bones, joint laxity and dislocations, advanced carpal/tarsal ossification, chondrodysplasia, growth retardation [17]. |
|                                                                          | <i>XYLT2</i><br>Initiating xylose transfer to the core protein (Xyl $\beta$ 1- <i>O</i> -Ser). | - <b>Spondyloocular syndrome</b> (MIM - 605822): Osteopenia/osteoporosis, cataract, deafness, heart defects [18].                                                                        |
|                                                                          | <i>B4GALT7</i><br>Transfer of the first galactose of the                                       | - <b>Ehlers-Danlos syndrome (EDS) spondylodysplastic type 1</b> (MIM - 130070):                                                                                                          |

|                                                                                                                                                 |                                                                                                                                                                                     |
|-------------------------------------------------------------------------------------------------------------------------------------------------|-------------------------------------------------------------------------------------------------------------------------------------------------------------------------------------|
| linkage (Gal $\beta$ 1–3Gal $\beta$ 1–4Xyl $\beta$ 1- <i>O</i> -Ser).                                                                           | Joint laxity, hyperelastic skin, short stature, hypotonia, poor wound healing [19].                                                                                                 |
| <i>B3GALT6</i>                                                                                                                                  | <b>- EDS progeroid type 2</b> (MIM – 615349) and <b>Spondyloepymetaphyseal dysplasia</b> (MIM – 271640):                                                                            |
| Transfer of the second galactose of the linkage region (Gal $\beta$ 1–3Gal $\beta$ 1–4Xyl $\beta$ 1- <i>O</i> -Ser).                            | Recurrent bone fractures, epimetaphyseal dysplasia, joint laxity and dislocations, cutaneous hyperlaxity, scoliosis, intellectual disabilities, poor wound healing, hypotonia [20]. |
| <i>B3GAT3</i>                                                                                                                                   | <b>Larsen-like syndrome</b> (MIM – 245600):                                                                                                                                         |
| Transfer of the terminating glucuronic acid of the linkage region (GlcA $\beta$ 1–3Gal $\beta$ 1–3Gal $\beta$ 1–4Xyl $\beta$ 1- <i>O</i> -Ser). | Joint laxity and dislocations, scoliosis, cutis laxa, heart defects [21].                                                                                                           |
| <i>FAM20B</i>                                                                                                                                   | <b>- Desbuquois dysplasia</b> (MIM - 615777) with lethal neonatal short limb dysplasia [22].                                                                                        |
| Phosphorylation of the xylose after the first galactose addition (Gal-Xyl(2- <i>O</i> -phosphate)- <i>O</i> -Ser ).                             |                                                                                                                                                                                     |

---

## GAG elongation defects

|                                                                           |                                                                                                                                                                 |
|---------------------------------------------------------------------------|-----------------------------------------------------------------------------------------------------------------------------------------------------------------|
| <i>CSGALNACT1</i>                                                         | <b>Mild skeletal dysplasia with advanced bone age</b> (unreferenced):                                                                                           |
| First GalNAc transfer to the linkage region: initiation of CS elongation. | Skeletal dysplasia, short stature, advanced bone age, facial dysmorphism, joint laxity, monkey wrench appearance of the femur, Bell's palsy, neuropathies [23]. |
| <i>CHSY1</i>                                                              | <b>- Temtamy preaxial brachydactyly syndrome</b> (MIM - 605282):                                                                                                |
| [GlcA-GalNAc] polymerization: CS GAG elongation                           | Characteristic digits shortening, facial dysmorphism, deafness, growth and mental retardation [24].                                                             |
| <i>EXTL3</i>                                                              | <b>- Neuro-immuno-skeletal dysplasia syndrome</b> (MIM - 617425):                                                                                               |
| First GlcNAc transfer to the linkage region: Initiation of HS elongation. | Severe immunodeficiency associated to skeletal dysplasia, developmental delay and intellectual disability [25].                                                 |

*EXT1/EXT2*  
[GlcA-GlcNAc] polymerization: HS  
GAG elongation

- **Hereditary multiple exostosis syndrome** (MIM - 133700/133701):  
Benign osteoarticular tumors called exostosis or osteochondromas leading to skeletal dysmorphisms [26-27].

*DSE*  
GlcA epimerization to IdoA: CS  
conversion to DS

- **EDS musculocontractural type 2** (MIM - 615539):  
Characteristic craniofacial deformities (large fontanel, hypertelorism, blue sclerae...), skin hyperextensibility, muscle hypoplasia and hypotonia, bruising [28].

---

**GAG sulfation defects**

*SLC26A2*  
Cell-surface inorganic sulfate transporter

- **Achondrogenesis type 1B** (MIM - 600972): Micromelia, flat face, short trunk, fetal/perinatal lethality. [29]  
  
- **Atelosteogenesis type 2** (MIM - 256050): Limb shortening, cleft palate, characteristic facial dysmorphisms, 'hitchhiker' thumbs, possible fetal/perinatal lethality.  
  
- **Achondrogenesis type 1B** (MIM - 600972): Micromelia, flat face, short trunk, fetal/perinatal lethality.  
  
- **Atelosteogenesis type 2** (MIM - 256050): Limb shortening, cleft palate, characteristic facial dysmorphisms, 'hitchhiker' thumbs, possible fetal/perinatal lethality.  
  
- **Diastrophic dysplasia** (MIM - 222600): Short and thick long bones, joint dysplasia, scoliosis, 'hitchhiker' thumbs, club feet, cleft palate, cysts on the external ear.  
  
- **Recessive multiple epiphyseal dysplasia type 4** (MIM - 226900): Flat epiphyses, hips arthritis, double layered-patella, clubfoot, brachydactyly, joint pain.

|                                                                     |                                                                                                                                                                               |
|---------------------------------------------------------------------|-------------------------------------------------------------------------------------------------------------------------------------------------------------------------------|
| <i>CHST3</i>                                                        | - <b>Spondyloepiphyseal dysplasia with joint laxity (SEDJL) CHST3 type</b> (MIM - 143095): Kyphosis/scoliosis, Club feet, knees and hips dislocations, short stature [30].    |
| Sulfation of GalNAc residues in the CS chains                       |                                                                                                                                                                               |
| <i>CHST6</i>                                                        | - <b>Macular corneal dystrophy</b> (MIM - 217800): Corneal opacity and thinning, photophobia, tearing, progressive vision loss [31].                                          |
| Sulfation of GlcNAc residues in KS chains                           |                                                                                                                                                                               |
| <i>CHST12*</i> , <i>CHST13*</i>                                     | - <b>Kashin-Beck disease*</b>                                                                                                                                                 |
| Sulfation of GalNAc residues on the CS chain                        | Joint pain, deformities and limited joint mobility in fingers, shoulders, ankles, knees, wrists, toes. Bone damage and short stature [32].                                    |
| <i>UST*</i>                                                         |                                                                                                                                                                               |
| Sulfation of GlcA/IdoA residue in CS/DS chains                      | <i>*Unestablished causality</i>                                                                                                                                               |
| <i>CHST14 (D4ST1)</i> Sulfation of GalNAc residues on the DS chains | - <b>EDS musculocontractural type 1</b> (MIM - 601776):<br>Muscle hypotonia, facial dysmorphisms, joint dislocation, skin hyperlaxity, club feet, bruising [33-34] .          |
| <i>PAPSS2</i>                                                       | - <b>Spondyloepimetaphyseal dysplasia Pakistani type</b> (MIM - 612847):<br>Short stature, scoliosis, osteoarthritis, mild brachydactyly [35].                                |
| Synthesis of sulfate donors (PAPS)                                  | - <b>Brachyolmia</b> (MIM - 271530): Short stature, short trunk, platyspondyly, vertebral deformities,, calcification of costal cartilage, and hormonal disturbances [36-37]. |

*IMPAD1* (inositol monophosphatase domain-containing 1)

Hydrolysis of PAP released from sulfation reactions

- **Chondrodysplasia with joint dislocations, gPAPP type** (MIM - 614078):

Short stature, chondrodysplasia with brachydactyly, joint dislocations, micrognathia, cleft palate and facial dysmorphism [38].

- **Catel-Manzke syndrome** (MIM - 616145):

Growth retardation, cleft palate with micrognathia, isolated knee hyperlaxity, abnormally shaped phalanges and carpal synostosis [39].

---

**Defects in UDP-sugar synthesis and transport**

*SLC35D1*

Transport of UDP-GlcA, UDP-GalNAc, UDP-GlcNAc, UDP-Gal, and UDP-Xyl in the ER.

- **Schneckenbecken dysplasia** (MIM - 269250):

Lethal chondrodysplasia, snail-like pelvis, flattened hypoplastic vertebral bodies, short ribs, short and wide fibulae, short and broad long bones with a dumbbell-like appearance, and precocious ossification of the tarsus [40].

*SLC35A3*

UDP-GlcNAc transport in the Golgi apparatus

- **SLC35A3-CDG - Autism spectrum disorder-epilepsy-arthrogryposis syndrome** (MIM - 615553):

Arthrogryposis, retromicrognathia, hypotonia, delayed psychomotor development, autism, seizures, microcephaly, and intellectual disability [41].

*SLC35A2*

UDP-Gal transport in the Golgi apparatus

- **SLC35A2-CDG** (MIM - 3000896):

Epilepsy, delayed psychomotor development, hypotonia, skeletal abnormalities, facial dysmorphism, inverted nipples, vision and hearing abnormalities, cardiac diseases [42].

|                                                     |                                                                                                                                                                    |                                                                                                                                                                                                                                                                                     |
|-----------------------------------------------------|--------------------------------------------------------------------------------------------------------------------------------------------------------------------|-------------------------------------------------------------------------------------------------------------------------------------------------------------------------------------------------------------------------------------------------------------------------------------|
|                                                     | <p><b>CANT1</b><br/>(Calcium activated nucleotidase)</p> <p>ER/Golgi protein involved in the hydrolysis of the UDP released after the glycosylation reactions</p>  | <p><b>- Desbuquois dysplasia type 1</b> (MIM - 613165):</p> <p>Severe growth retardation, joint laxity, short extremities, scoliosis, short long bones with metaphyseal splay, 'Swedish key' appearance of the proximal femur and advanced carpal and tarsal ossification [43].</p> |
|                                                     | <p><b>TGDS</b></p> <p>Unknown function (possible involvement in UDP-sugar biosynthesis)</p>                                                                        | <p><b>- Catel-Manzke syndrome</b> (MIM:616145):</p> <p>Pierre robin sequence (cleft palate, glossoptosis, micrognathia, breathing difficulties), hyperphalangy, joint hypermobility, short long bones [44].</p>                                                                     |
|                                                     | <p><b>UGDH</b></p> <p>Synthesis of UDP-GlcA from UDP-glucose</p>                                                                                                   | <p><b>- Epileptic encephalopathy with developmental delay</b> (MIM – 603370/618792)</p> <p>Severe developmental delay, epileptic encephalopathy, facial dysmorphisms [45].</p>                                                                                                      |
| <b>Defects linked to impaired Golgi homeostasis</b> | <p><b>TMEM165</b></p> <p>Golgi localized <math>\text{Ca}^{2+}</math> - <math>\text{Mn}^{2+}</math> / <math>\text{H}^{+}</math> antiporter</p>                      | <p><b>- TMEM165-CDG</b> (MIM:614727):</p> <p>Psychomotor and growth retardation, facial dysmorphism, skeletal dysplasia with osteoporosis, scoliosis [46].</p>                                                                                                                      |
|                                                     | <p><b>COG4</b><br/>(Conserved oligomeric Golgi - subunit 4)</p> <p>Tethering complex involved in the retrograde trafficking from the Golgi apparatus to the ER</p> | <p><b>- Saul Wilson syndrome</b> (MIM:606976):</p> <p>Short stature, characteristic craniofacial dysmorphisms, prominent forehead, cataract, microencephaly, clubfoot, brachydactyly, irregularities of the vertebral bodies [47].</p>                                              |

*SLC10A7*

Ca<sup>2+</sup> influx regulation across intracellular membranes

- **Skeletal dysplasia and amelogenesis**

**imperfecta** (unreferenced):

Short stature, microretrognathia, dislocations, monkey wrench appearance of the femora, short long bones, advanced carpal and tarsal ossification, severe tooth abnormalities [48].

*GORAB* (Golgin Rab6-interacting protein)

Trans-Golgi protein involved in retrograde trafficking

- **Geroderma osteodysplastica**

(MIM:231070):

Lax and wrinkled skin, osteoporosis with spontaneous fractures, short stature, joint dislocations, and intellectual disabilities [49].

-

## References

1. Kolset, S. O.; Tveit, H. Serglycin – Structure and biology. *Cell* **2008**, *Mol. Life Sci.* vol. 65, p. 1073–1085.
2. Alexopoulou, A.; Multhaupt N.; Couchman, H. A. Syndecans in wound healing, inflammation and vascular biology. *The International Journal of Biochemistry & Cell Biology* **2007**, vol. 39, p. 505–528.
3. Song, H. H.; Filmus, J. The role of glypicans in mammalian development. *Biochimica et Biophysica Acta - General Subjects* **2002**, vol. 1573, p. 241–246.
4. Kiani, C.; Chen, L.; Wu, Y. J.; Yee, A. J.; Yang, B. B. Structure and function of aggrecan. *Cell Research* **2002**, vol. 12, p. 19–32.
5. Jan, A. T.; Lee, E. J.; Choi, I. Fibromodulin: A regulatory molecule maintaining cellular architecture for normal cellular function. *The International Journal of Biochemistry & Cell Biology* **2016**, vol. 80, p. 66–70.
6. Rühland, C. et al. The glycosaminoglycan chain of decorin plays an important role in collagen fibril formation at the early stages of fibrillogenesis. *FEBS J* **2007**, vol. 274, p. 4246–4255.
7. Csordás, G. et al. Sustained down-regulation of the epidermal growth factor receptor by decorin. A mechanism for controlling tumor growth in vivo. *J Biol Chem* **2000**, vol. 275, p. 32879–32887.
8. Kram, V. et al. Biglycan in the Skeleton. *J Histochem Cytochem* **2020**, vol. 68, p. 747–762.
9. Ye, Y. et al. Glycosaminoglycan chains of biglycan promote bone morphogenetic protein-4-induced osteoblast differentiation. *Int J Mol Med* **2012**, vol. 30, p. 1075–1080.
10. Seppinen, L.; Pihlajaniemi, T. The multiple functions of collagen XVIII in development and disease. *Matrix Biology* **2011**, vol. 30, p. 83–92.
11. Kali, A.; Shetty, K. S. R. Endocan: A novel circulating proteoglycan. *Indian J Pharmacol* **2014**, 46, 579–583.
12. Lord, M. S., Melrose, J., Day, A. J. & Whitelock, J. M. The Inter- $\alpha$ -Trypsin Inhibitor Family: Versatile Molecules in Biology and Pathology. *J Histochem Cytochem* **2020**, vol. 68, p. 907–927.
13. Partenheimer, A.; Schwarz, K.; Wrocklage, C.; Kölsch, E.; Kresse, H. Proteoglycan form of colony-stimulating factor-1 (proteoglycan-100). Stimulation of activity by glycosaminoglycan removal and proteolytic processing. *The Journal of Immunology* **1995**, vol. 155, p. 5557–5565.
14. Chang, M. Y., Olin, K. L., Tsoi, C., Wight, T. N. & Chait, A. Human monocyte-derived macrophages secrete two forms of proteoglycan-macrophage colony-stimulating factor that differ in their ability to bind low density lipoproteins. *J Biol Chem* **1998**, vol. 273, p. 15985–15992.
15. Lamant, M. et al. ApoO, a novel apolipoprotein, is an original glycoprotein up-regulated by diabetes in human heart. *J Biol Chem* **2006**, vol. 281, p. 36289–36302.
16. Weijler, A. M.; Schmidinger, B.; Kapiotis, S.; Laggner, H. & Hermann, M. Oleic acid induces the novel apolipoprotein O and reduces mitochondrial membrane potential in chicken and human hepatoma cells. *Biochimie* **2018**, vol. 147, p. 136–142.
17. Bui, C. et al. XYLT1 Mutations in Desbuquois Dysplasia Type 2. *The American Journal of Human Genetics* **2014**, vol. 94, p. 405–414.
18. Munns, C. F et al. Homozygosity for frameshift mutations in XYLT2 result in a spondylo-ocular syndrome with bone fragility, cataracts, and hearing defects. *Am. J. Hum. Genet.* **2015**, vol. 96, p. 971–978.
19. Almeida, R et al. Cloning and expression of a proteoglycan UDP-galactose:beta-xylose beta1,4-galactosyltransferase I. A seventh member of the human beta4-galactosyltransferase gene family. *J. Biol. Chem.* **1999**, vol. 274, p. 26165–26171
20. Malfait, F. et al. Defective Initiation of Glycosaminoglycan Synthesis due to B3GALT6 Mutations Causes a Pleiotropic Ehlers-Danlos-Syndrome-like Connective Tissue Disorder. *Am J Hum Genet* **2013**, vol. 92, p. 935–945.
21. Baasanjav, S et al. Faulty Initiation of Proteoglycan Synthesis Causes Cardiac and Joint Defects. *Am J Hum Genet* **2011**, vol. 89, p. 15–27.
22. Kuroda, Y. et al. A novel gene (FAM20B encoding glycosaminoglycan xylosylkinase) for neonatal short limb dysplasia resembling Desbuquois dysplasia. *Clinical Genetics* **2019**, vol. 95, p. 713–717.
23. Vodopiutz, J et al. Chondroitin Sulfate N-acetylgalactosaminyltransferase-1 (CSGalNAcT-1) Deficiency Results in a Mild Skeletal Dysplasia and Joint Laxity. *Human Mutation* **2017**, vol. 38, no 1, p. 34–38.
24. Li, Y. et al. Temtamy preaxial brachydactyly syndrome is caused by loss-of-function mutations in chondroitin synthase 1, a potential target of BMP signaling. *Am. J. Hum. Genet.* **2010**, vol. 87, p. 757–767.
25. Volpi, S. et al. EXTL3 mutations cause skeletal dysplasia, immune deficiency, and developmental delay. *J Exp Med* **2017**, vol. 214, p. 623–637.
26. Ahn, J et al. Cloning of the putative tumour suppressor gene for hereditary multiple exostoses (EXT1). *Nat Genet* **1995**, vol. 11, p. 137–143.

27. Stickens, D *et al.* The EXT2 multiple exostoses gene defines a family of putative tumour suppressor genes. *Nat Genet* **1996**, vol. 14, p. 25-32.
28. Müller, T. *et al.* Loss of dermatan sulfate epimerase (DSE) function results in musculocontractural Ehlers–Danlos syndrome. *Hum Mol Genet* **2013**, vol. 22, p. 3761–3772.
29. Hästbacka, J *et al.* The diastrophic dysplasia gene encodes a novel sulfate transporter: positional cloning by fine-structure linkage disequilibrium mapping. *Cell* **1994**, vol. 78, p. 1073-1087.
30. Thiele, H *et al.* Loss of chondroitin 6-O-sulfotransferase-1 function results in severe human chondrodysplasia with progressive spinal involvement. *PNAS* **2004**, vol. 101, p. 10155-10160.
31. Akama, T. O *et al.* Macular corneal dystrophy type I and type II are caused by distinct mutations in a new sulphotransferase gene. *Nat Genet* **2000**, vol. 26, p. 237-241.
32. Guo, Y. *et al.* Decreased Expression of CHST-12, CHST-13, and UST in the Proximal Interphalangeal Joint Cartilage of School-Age Children with Kashin-Beck Disease: an Endemic Osteoarthritis in China Caused by Selenium Deficiency. *Biol Trace Elem Res* **2019**, vol. 191, p. 276–285.
33. Dündar, M *et al.* Loss of dermatan-4-sulfotransferase 1 function results in adducted thumb-clubfoot syndrome. *Am. J. Hum. Genet.* **2009**, vol. 85, p. 873-882.
34. Miyake, N *et al.* Loss-of-function mutations of CHST14 in a new type of Ehlers-Danlos syndrome. *Human Mutation* **2010**, vol. 31, p. 966-974, 2010.
35. ul Haque, M. F *et al.* Mutations in orthologous genes in human spondyloepimetaphyseal dysplasia and the brachymorphic mouse. *Nature Genetics* **1998**, vol. 20, Art. n° 2.
36. Miyake, N. *et al.* PAPSS2 mutations cause autosomal recessive brachyolmia. *J Med Genet* **2012**, vol. 49, p. 533–538.
37. Oostdijk, W. *et al.* PAPSS2 deficiency causes androgen excess via impaired DHEA sulfation--in vitro and in vivo studies in a family harboring two novel PAPSS2 mutations. *J. Clin. Endocrinol. Metab.* **2015**, vol. 100, E672-680.
38. Vissers, L. E. L. M. *et al.* Chondrodysplasia and Abnormal Joint Development Associated with Mutations in IMPAD1, Encoding the Golgi-Resident Nucleotide Phosphatase, gPAPP. *Am J Hum Genet* **2011**, vol. 88, p. 608–615.
39. Nizon, M. *et al.* IMPAD1 mutations in two Catel-Manzke like patients. *American Journal of Medical Genetics Part A* **2012**, 158A, 2183–2187.
40. Furuichi, T. *et al.* Identification of loss-of-function mutations of SLC35D1 in patients with Schneckenbecken dysplasia, but not with other severe spondylodysplastic dysplasias group diseases. *J. Med. Genet.* **2009**, vol. 46, p. 562–568.
41. Edvardson, S. *et al.* Mutations in SLC35A3 cause autism spectrum disorder, epilepsy and arthrogryposis. *J. Med. Genet.* **2013**, vol. 50, p. 733–739.
42. Ng, B. G. *et al.* Mosaicism of the UDP-Galactose Transporter SLC35A2 Causes a Congenital Disorder of Glycosylation. *Am J Hum Genet* **2013**, vol. 92, 632–636.
43. Huber, C. *et al.* Identification of CANT1 Mutations in Desbuquois Dysplasia. *American Journal of Human Genetics* **2009**, 85, vol. 706.
44. Boschann, F. *et al.* TGDS pathogenic variants cause Catel-Manzke syndrome without hyperphalangy. *Am J Med Genet A* **2020**, vol. 182, p. 431–436.
45. Hengel, H. *et al.* Loss-of-function mutations in UDP-Glucose 6-Dehydrogenase cause recessive developmental epileptic encephalopathy. *Nat Commun* **2020**, vol. 11, p. 595.
46. Foulquier, F. *et al.* TMEM165 Deficiency Causes a Congenital Disorder of Glycosylation. *Am J Hum Genet* **2012**, vol. 91, p. 15–26.
47. Ferreira, C. R. *et al.* A Recurrent De Novo Heterozygous COG4 Substitution Leads to Saul-Wilson Syndrome, Disrupted Vesicular Trafficking, and Altered Proteoglycan Glycosylation. *Am J Hum Genet* **2018**, vol. 103, p. 553–567.
48. Laugel-Haushalter, V. *et al.* A New SLC10A7 Homozygous Missense Mutation Responsible for a Milder Phenotype of Skeletal Dysplasia With Amelogenesis Imperfecta. *Front Genet* **2019**, vol. 10, p. 504.
49. Rajab, A. *et al.* Geroderma osteodysplasticum hereditaria and wrinkly skin syndrome in 22 patients from Oman. *Am. J. Med. Genet. A* **2008**, vol. 146A, p. 965–976.
